# Supplementary material
Source: PubMed Central journal article supplement (PMC4715682)
Supplement: NIHMS743904-supplement-6.pdf [file NIHMS743904-supplement-6.pdf]

**Figure S6**

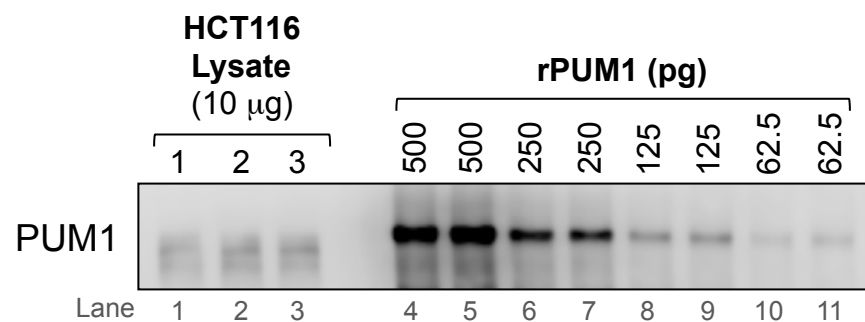

| Lane  | PUM1 mass (pg) | PUM1 molecules | Cell number | PUM1 molecules per cell |
|-------|----------------|----------------|-------------|-------------------------|
| 1     | 151            | 654,363,945    | 45,455      | <b>14,396</b>           |
| 2     | 161            | 701,781,622    | 45,455      | <b>15,439</b>           |
| 3     | 165            | 782,391,673    | 45,455      | <b>17,213</b>           |
| 4,5   | 500            | 2,370,883,858  |             |                         |
| 6,7   | 250            | 1,185,441,929  |             |                         |
| 8,9   | 125            | 592,720,965    |             |                         |
| 10,11 | 62.5           | 296,360,482    |             |                         |

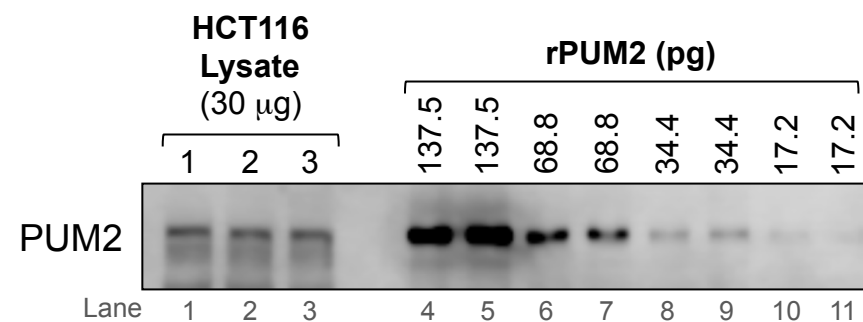

| Lane  | PUM2 mass (pg) | PUM2 molecules | Cell number | PUM2 molecules per cell |
|-------|----------------|----------------|-------------|-------------------------|
| 1     | 54             | 286,839,512    | 136,364     | <b>2,103</b>            |
| 2     | 53             | 278,915,768    | 136,364     | <b>2,045</b>            |
| 3     | 50             | 266,766,029    | 136,364     | <b>1,956</b>            |
| 4,5   | 137.5          | 726,343,147    |             |                         |
| 6,7   | 68.75          | 363,171,574    |             |                         |
| 8,9   | 34.375         | 181,585,787    |             |                         |
| 10,11 | 17.1875        | 90,792,893     |             |                         |
