# Supplementary material
Source: PubMed Central journal article supplement (PMC4715682)

Figure S1

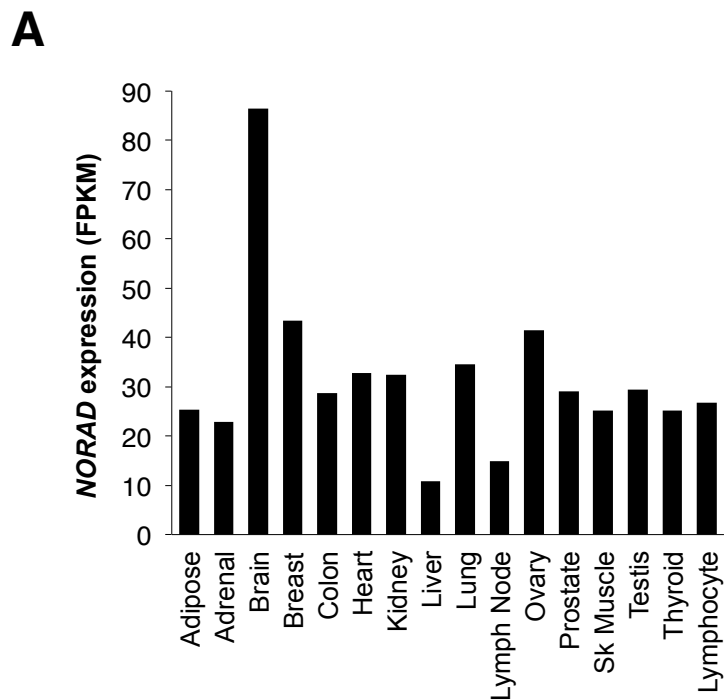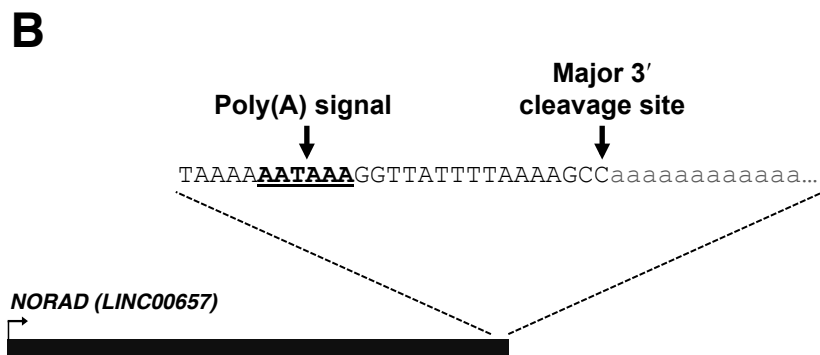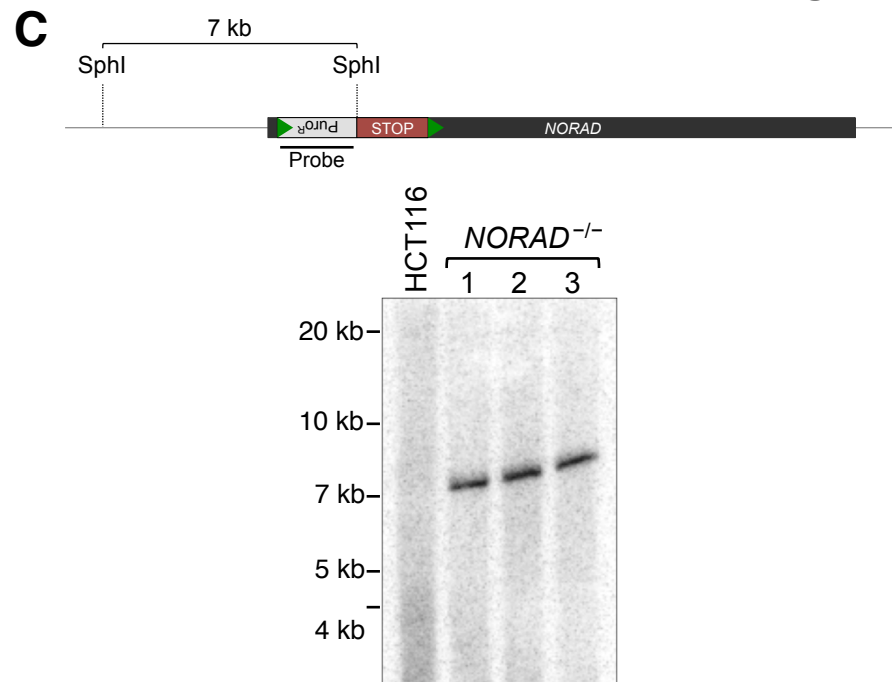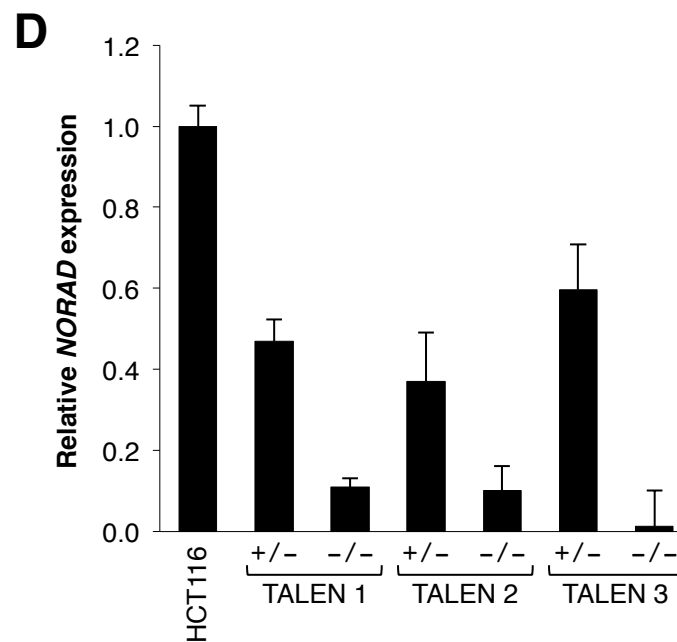

Supplement: NIHMS743904-supplement-1.pdf [file NIHMS743904-supplement-1.pdf]

Figure S2

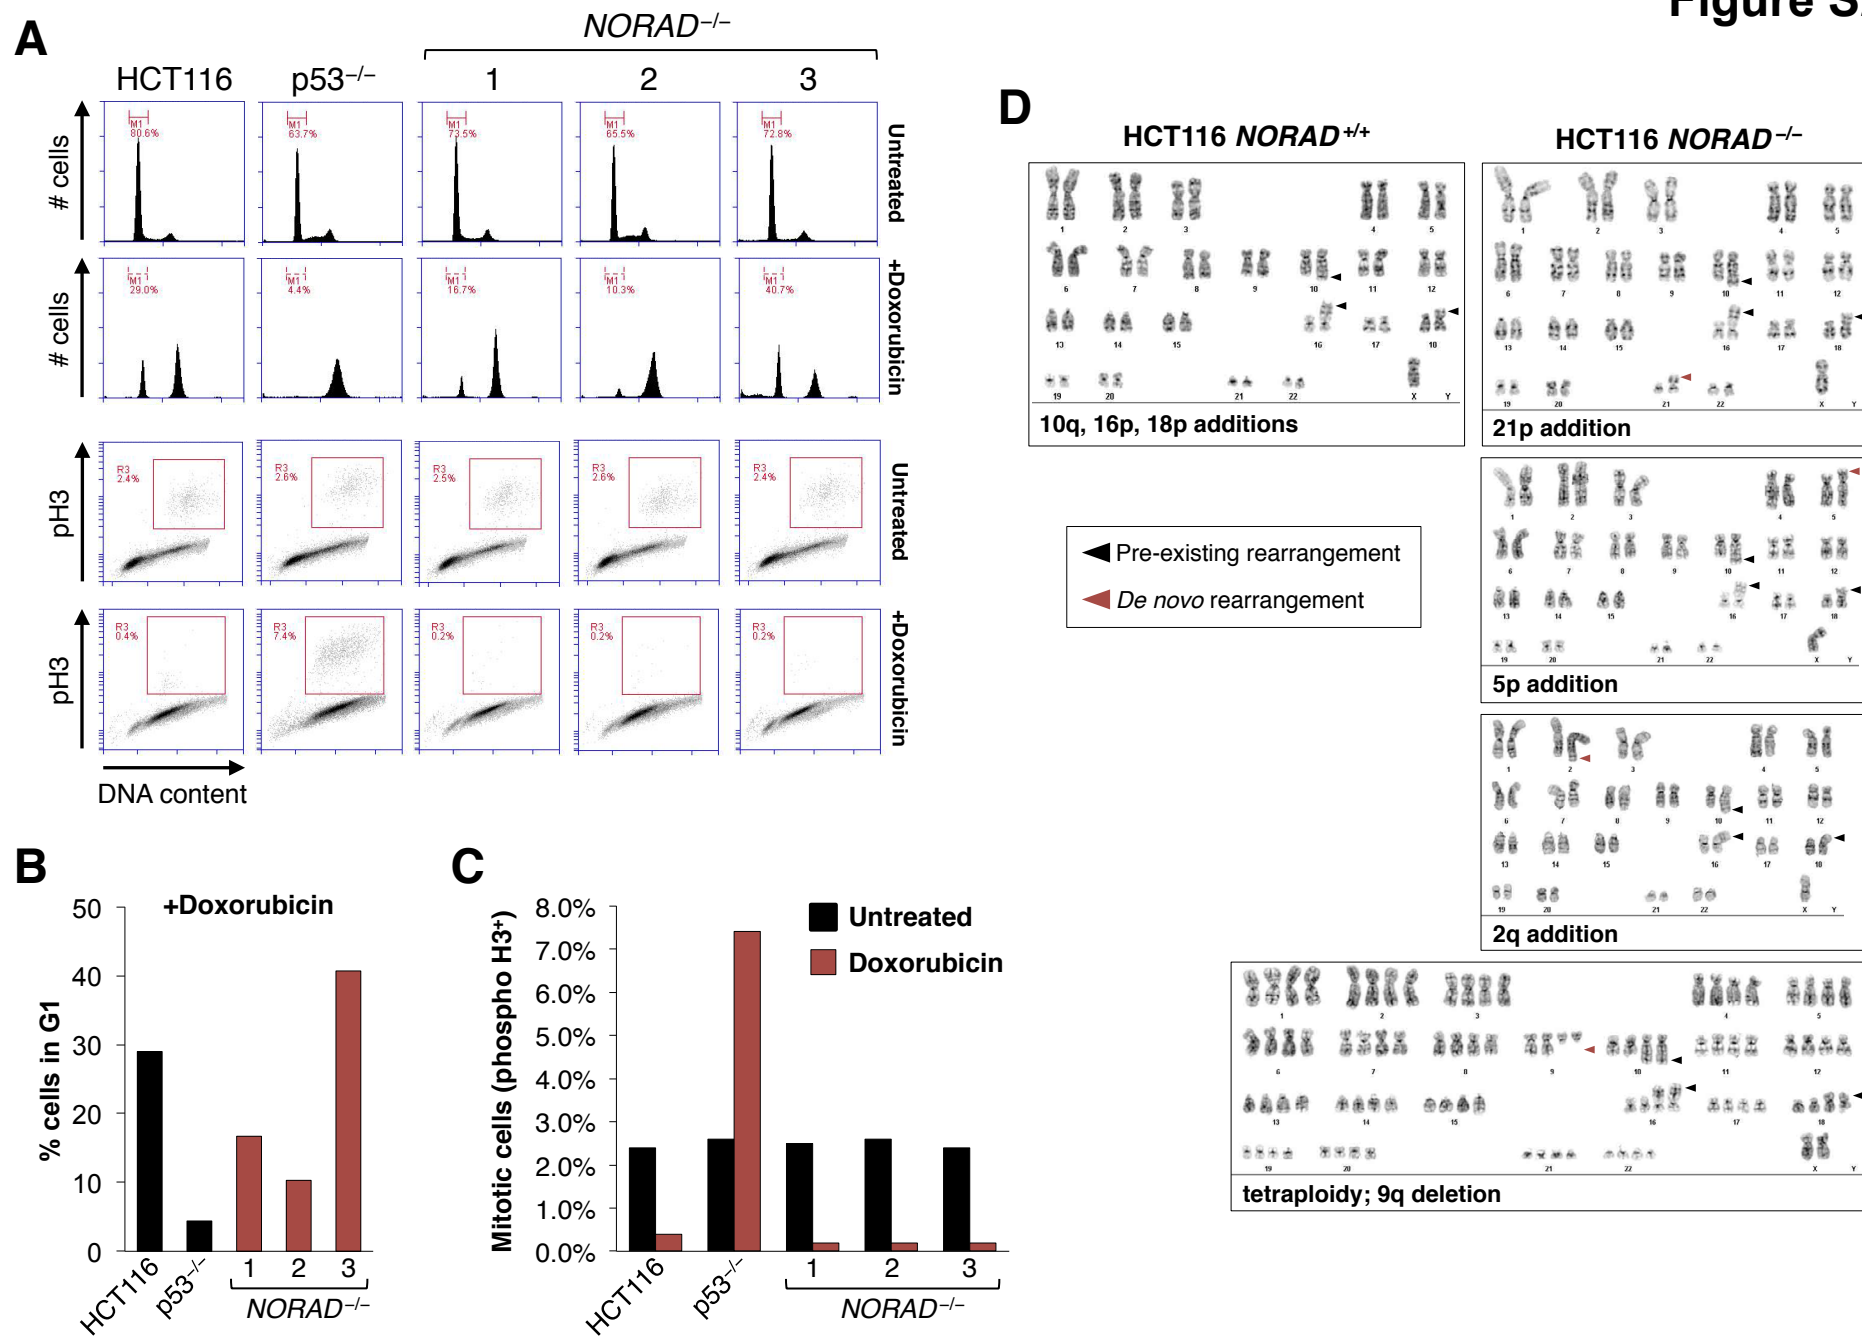

Supplement: NIHMS743904-supplement-2.pdf [file NIHMS743904-supplement-2.pdf]

Figure S3

**A**

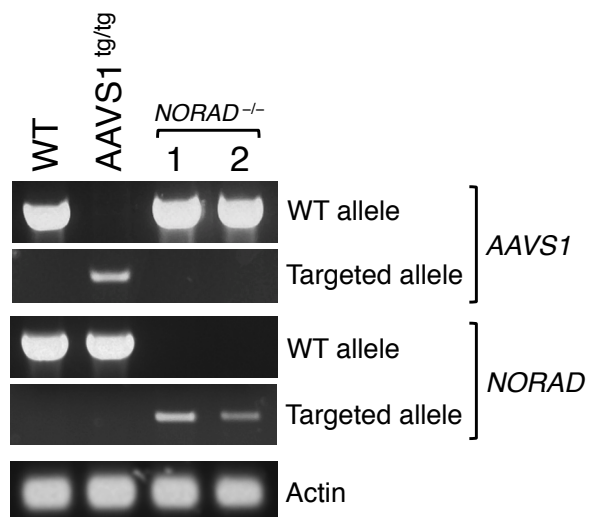

**B**

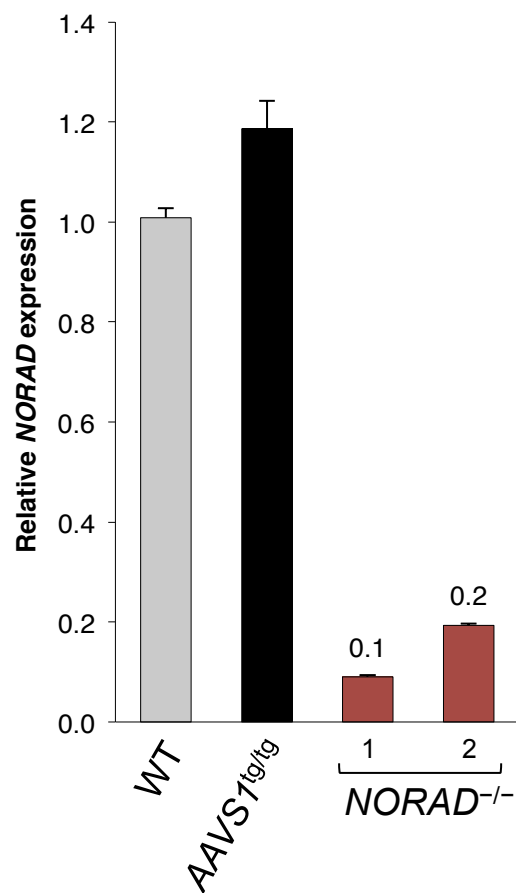

**C**

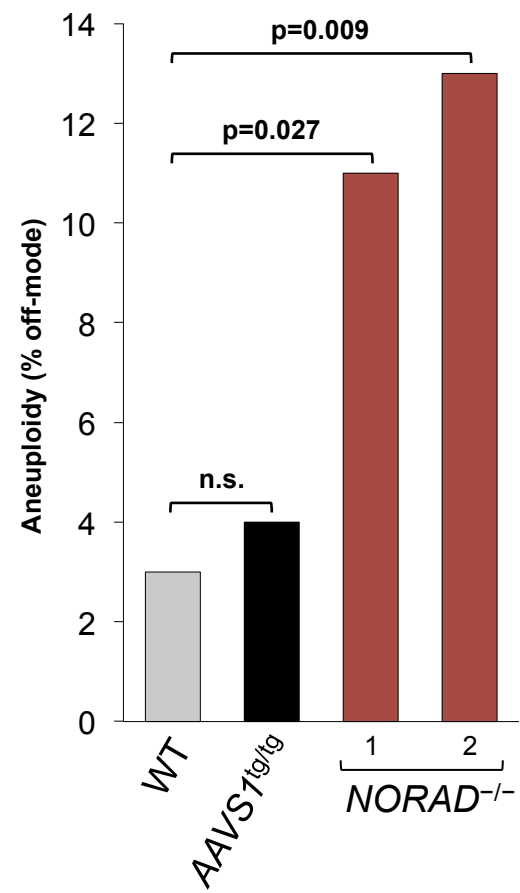

Supplement: NIHMS743904-supplement-3.pdf [file NIHMS743904-supplement-3.pdf]

Figure S4

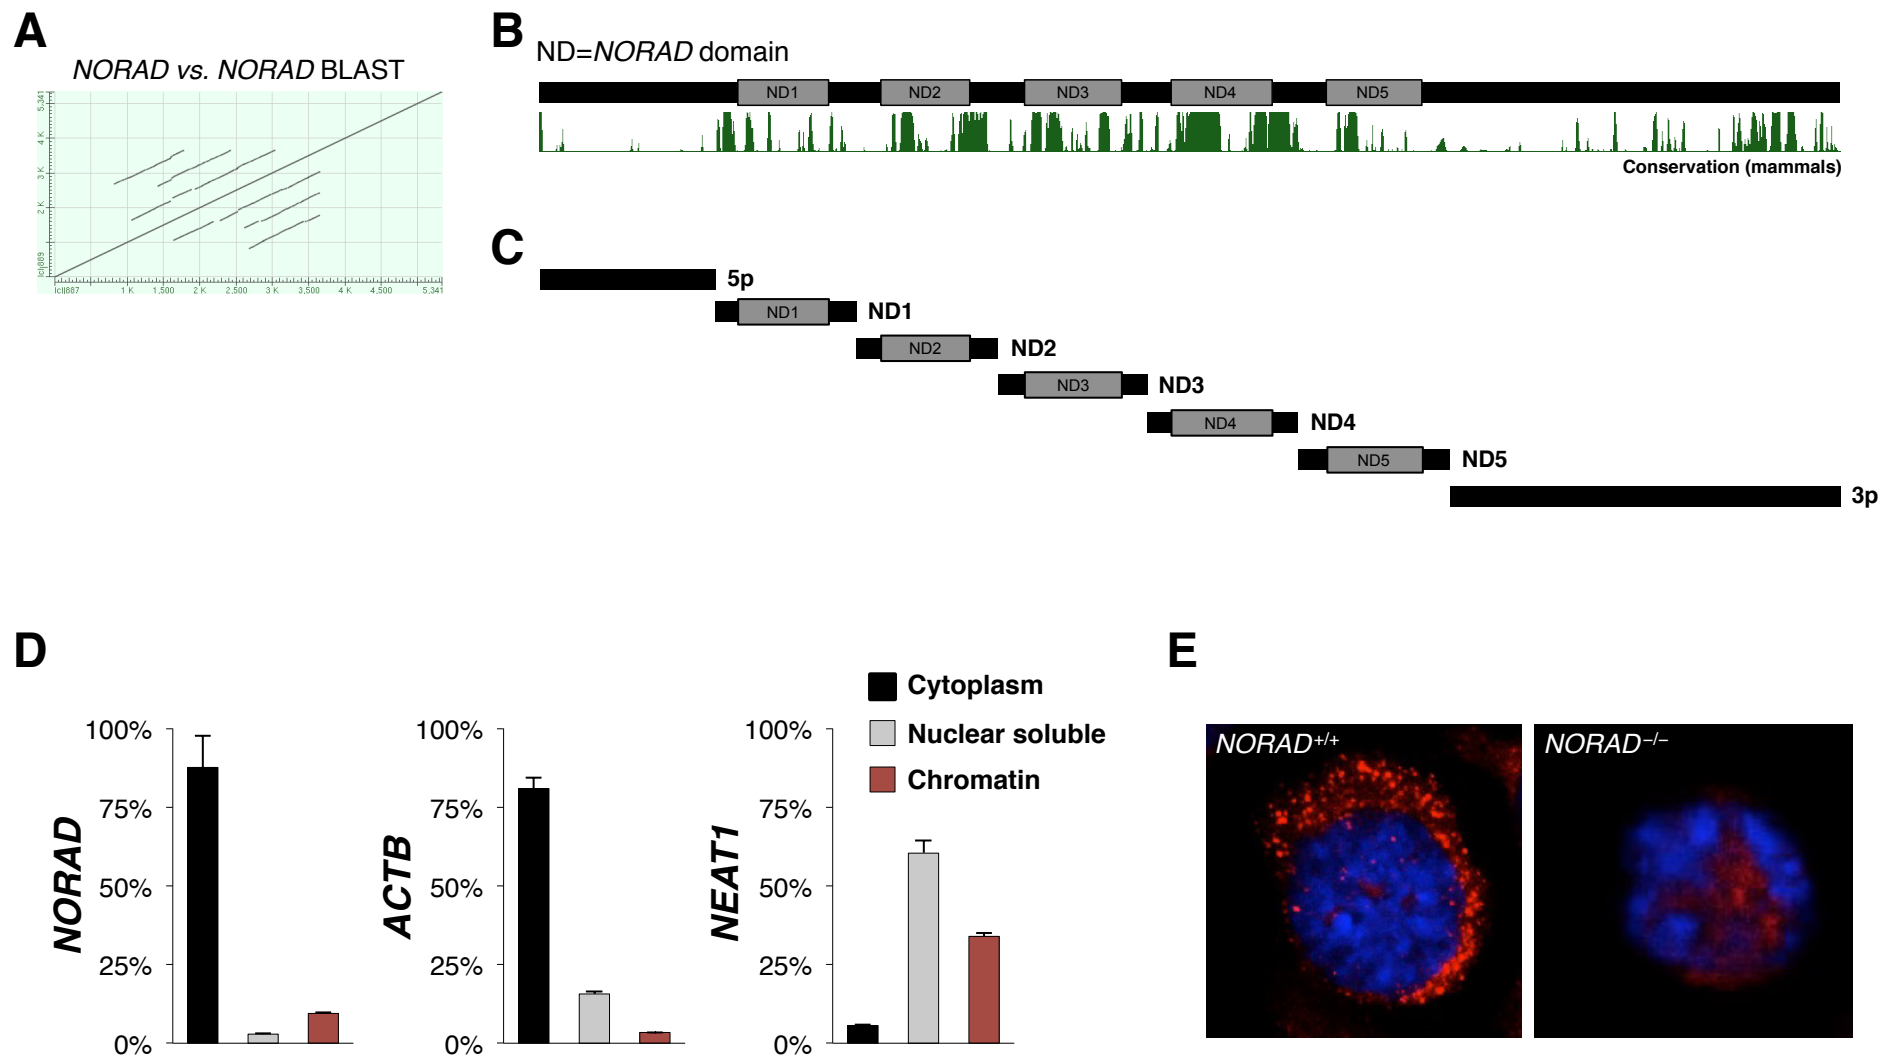

Supplement: NIHMS743904-supplement-4.pdf [file NIHMS743904-supplement-4.pdf]

Figure S5

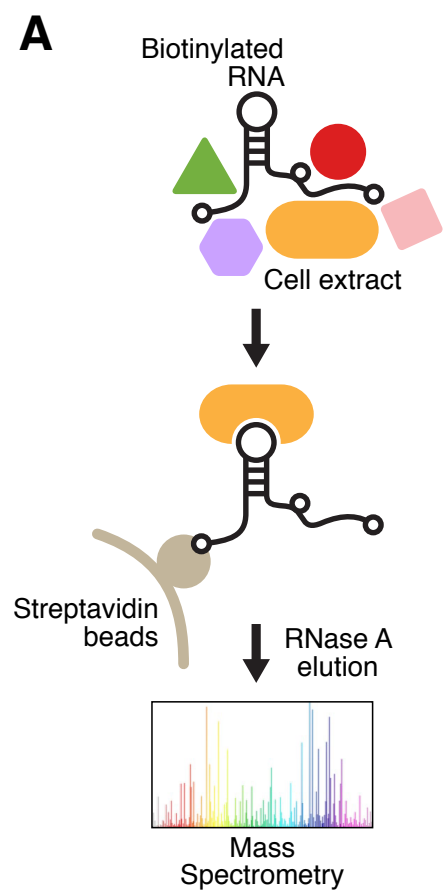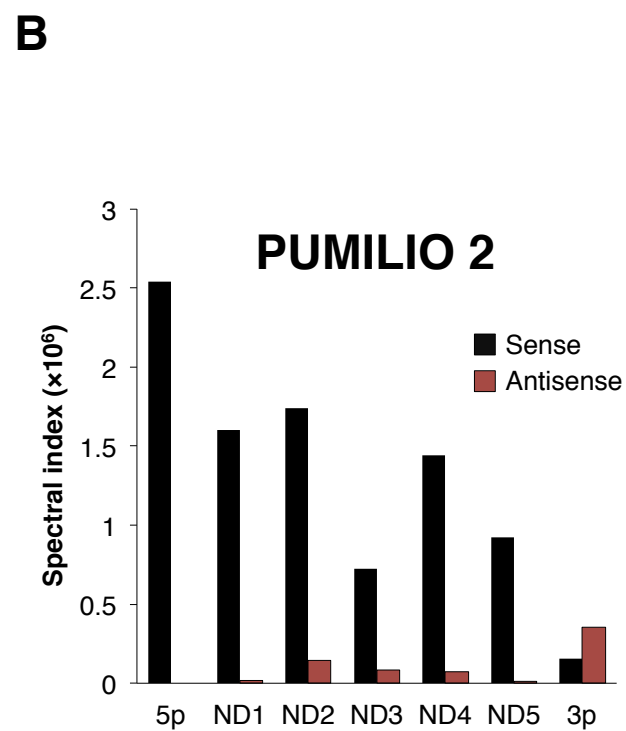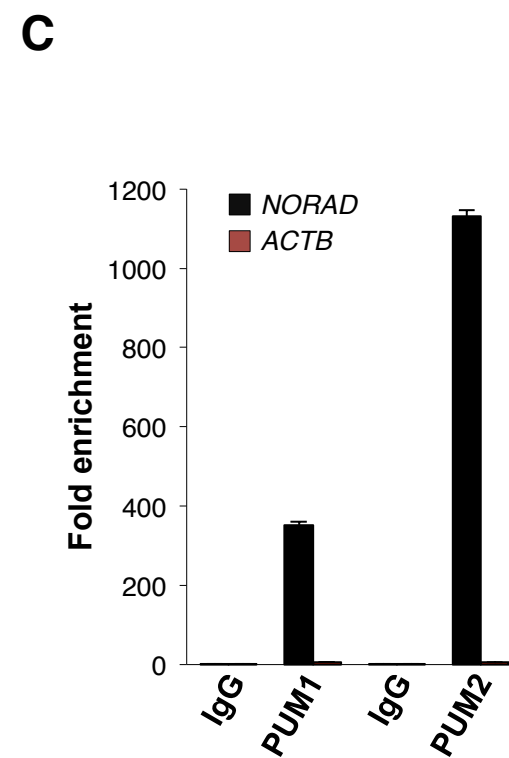

Supplement: NIHMS743904-supplement-5.pdf [file NIHMS743904-supplement-5.pdf]

**Figure S7**

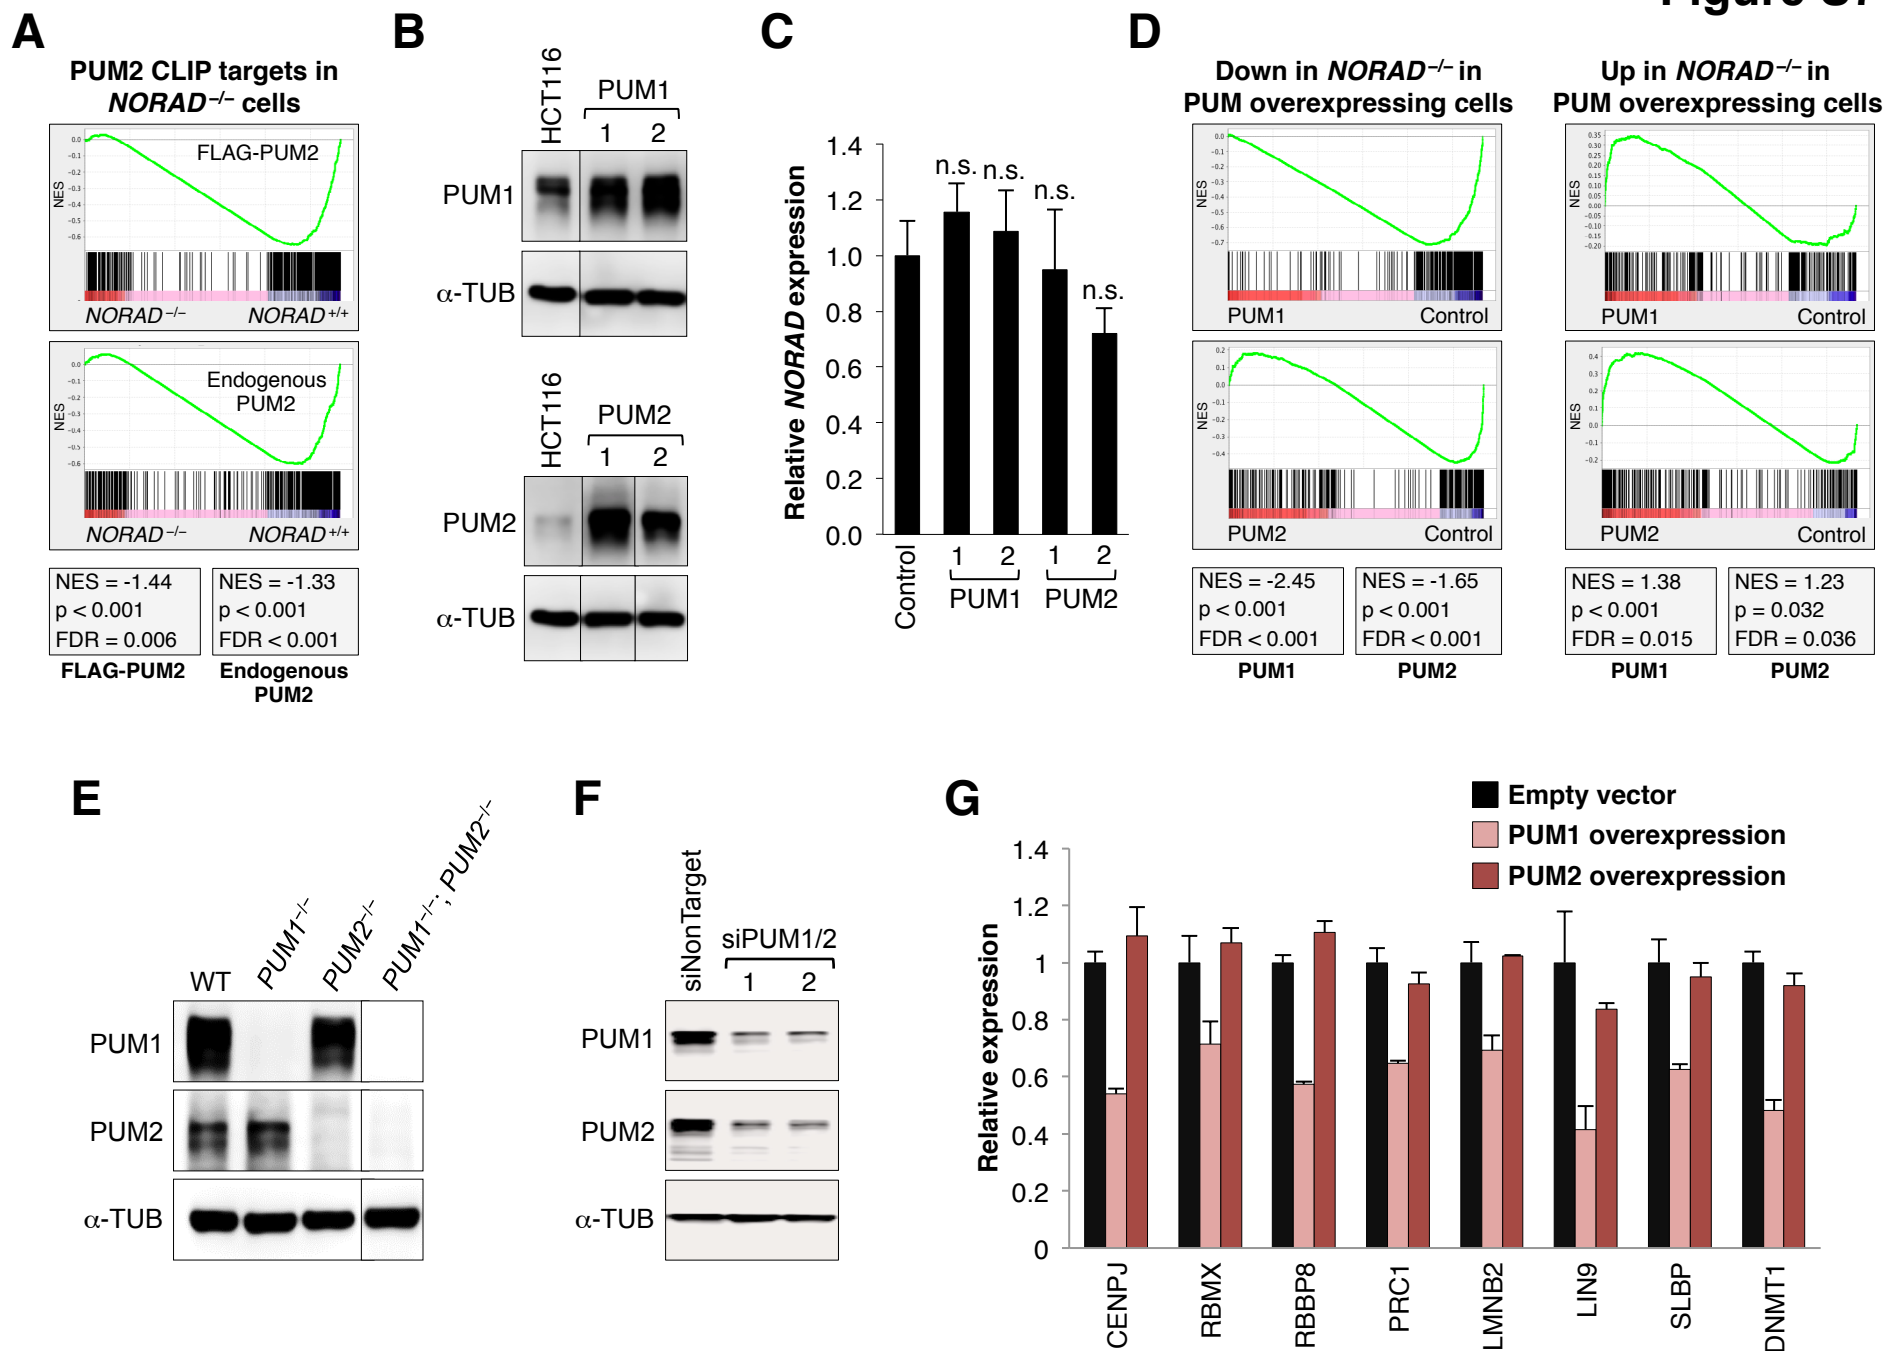

Supplement: NIHMS743904-supplement-7.pdf [file NIHMS743904-supplement-7.pdf]
